# Supplementary material for: A subset of neutrophils in human systemic inflammation inhibits T cell responses through Mac-1
Source: JCI journal article supplement (doi:10.1172/jci57990), 2011-12-12
Supplement: sd1 [file 1]

301 Moved Permanently

# Moved Permanently

The document has moved here.
